# Supplementary material for: Antitumor Effect of Poplar Propolis on Human Cutaneous Squamous Cell Carcinoma A431 Cells
Source: MDPI journal article supplement (doi:10.3390/ijms242316753), 2023-11-25
Supplement: s1 [file s1]

Supplemental files

**Table S1 The cycle threshold (ct) data of selected genes.**

| Gene          | Control | Control | Control | Treatment | Treatment | Treatment |
|---------------|---------|---------|---------|-----------|-----------|-----------|
| <i>Actin</i>  | 16.13   | 16.35   | 16.43   | 17.97     | 18.03     | 17.86     |
| <i>FN1</i>    | 18.36   | 17.73   | 18.07   | 20.04     | 19.18     | 20.33     |
| <i>LAMC1</i>  | 21.00   | 20.30   | 20.59   | 20.80     | 20.84     | 20.15     |
| <i>SDC1</i>   | 35.49   | 28.28   | 27.27   | 27.73     | 27.01     | 27.59     |
| <i>THBS1</i>  | 25.99   | 25.36   | 25.01   | 26.31     | 25.92     | 26.50     |
| <i>NDUFA2</i> | 24.47   | 24.42   | 24.33   | 25.05     | 23.82     | 24.38     |
| <i>NDUFS1</i> | 26.31   | 26.09   | 26.10   | 26.43     | 26.20     | 26.19     |
| <i>NDUFV1</i> | 28.99   | 29.06   | 29.42   | 28.84     | 28.94     | 29.09     |
| <i>SDHA</i>   | 21.55   | 21.75   | 22.15   | 22.58     | 23.00     | 22.89     |

**Table S2 Primer sequences for PCR amplification**

| Primer name    |   | Primer sequences (5'to3') |
|----------------|---|---------------------------|
| <i>β-actin</i> | F | GATCATTGCTCCTCCTGAGC      |
| <i>β-actin</i> | R | ACTCCTGCTTGCTGATCCAC      |
| <i>LAMC1</i>   | F | GCATCTGCATCTCCTACCCC      |
| <i>LAMC1</i>   | R | CGGATGGCTCAGTGTCTAC       |
| <i>SDC1</i>    | F | GAGCTGAAAGGCCGGGAAC       |
| <i>SDC1</i>    | R | CTACTGCCGGATTCCTCTCC      |
| <i>THBS1</i>   | F | ACAGTAAGTCATAGCAACATTCACA |
| <i>THBS1</i>   | R | GGGGCCCTTGACTTAGGGAT      |
| <i>NDUFS1</i>  | F | AAAGGATGTGGGAAGGTGTGAT    |
| <i>NDUFS1</i>  | R | GCACGCTTCCCCTCTAAAAA      |
| <i>NDUFV1</i>  | F | TGAAGGTGACAGCGTGAGGT      |
| <i>NDUFV1</i>  | R | TTCTTGGGTGCTGTCCGC        |
| <i>SDHA</i>    | F | TGCCATCCACTACATGACGG      |
| <i>SDHA</i>    | R | GCTCTGTCCACCAAATGCAC      |
